# Supplementary material for: Identification of Prognostic Genes and Immune Landscape Signatures Based on Tumor Microenvironment in Lung Adenocarcinoma
Source: Hindawi journal article supplement (doi:10.1155/2022/6703053), 2022-08-18

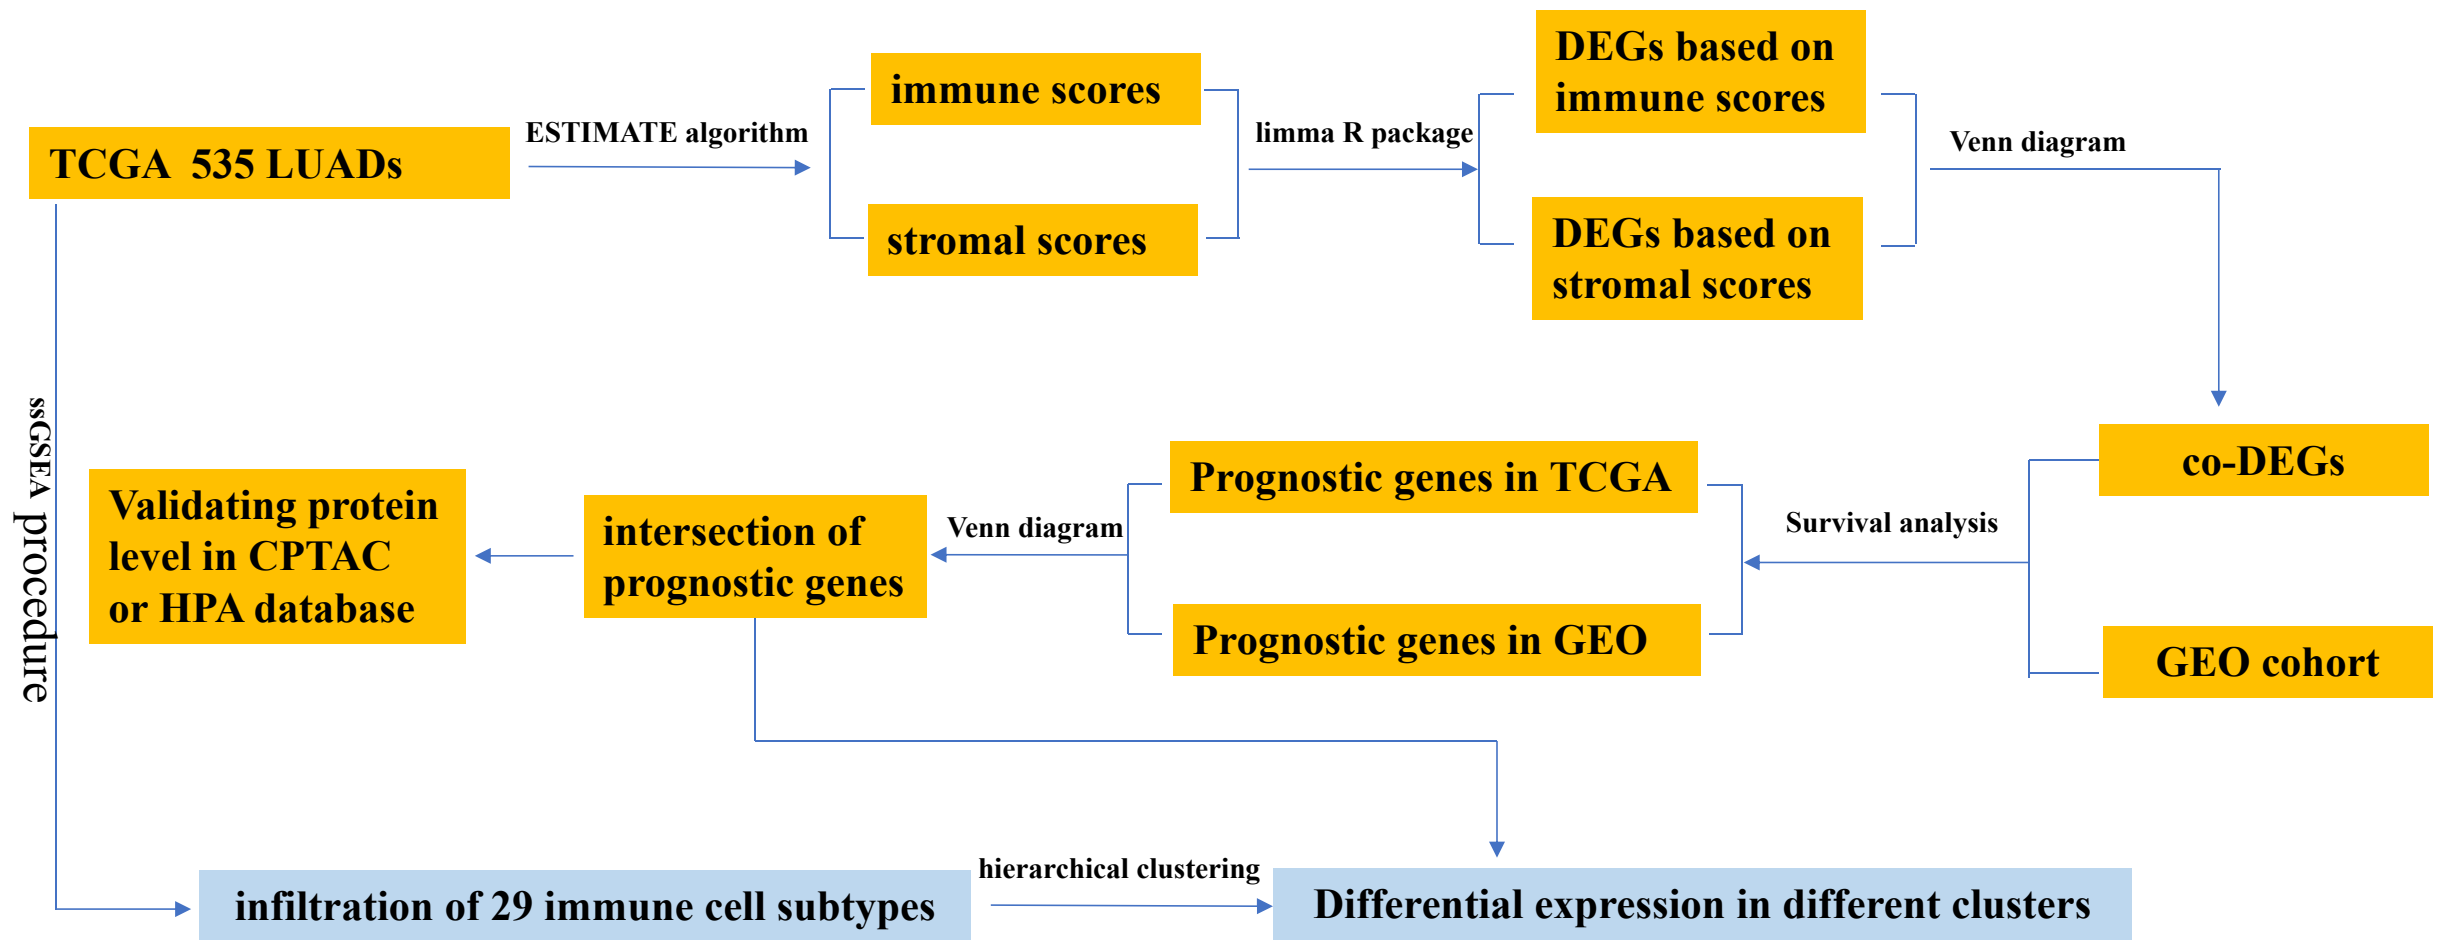

Supplement: f1 [file 6703053.f1.pdf]
